RUNNING HEAD: Populist attitude and Preventive Health Behaviors

1 **Full title:** “Populist Attitude and Conspiracist beliefs contribution to the overconfidence about the  
2 risk of Covid-19: implications for Preventive Health Behaviors”

3

4

**Authors:**

5

Giuliani Agnese <sup>a</sup>,

6

Presaghi Fabio <sup>a</sup>

7

8

<sup>a</sup>Department of Psychology of Developmental and Social Processes,

9

Sapienza University of Rome

10

11

12 Correspondence should be addressed to:

13 Agnese Giuliani,

14 e-mail: [giuliani.agn@gmail.com](mailto:giuliani.agn@gmail.com)

15 ORCID: 0000-0001-5269-724X

16

17 Fabio Presaghi

18 e-mail: [fabio.presaghi@uniroma1.it](mailto:fabio.presaghi@uniroma1.it)

19 ORCID: 0000-0001-7880-6715

RUNNING HEAD: Populist attitude and Preventive Health Behaviors

20

**Abstract**

21 Populism and Conspiracy beliefs seem to represent the zeitgeist of people depending on fast and  
22 simple information retrieved through social media. The Covid-19 emergency has simply catalyzed  
23 this process, not without consequences. Supported by literature review, we hypothesize that the  
24 higher the populist attitude the higher the tendency in believing in conspiracies, and that both higher  
25 populist attitudes and conspiracist beliefs may induce people in underestimating health related risks  
26 that may be reflected in a lowered tendency in adopting preventive health behaviors against Covid-  
27 19 spread. Data collected during the quarantine (December 2020, March 2021) mainly supported  
28 our hypotheses. Results are discussed in accord with the dramatic consequences it may have  
29 overconfidence in undermining the adoption of preventive health behaviors.

30

31 *Keywords:* Populist attitude, Conspiracist beliefs, Overconfidence, Preventive health behaviors,  
32 Covid-19

33

RUNNING HEAD: Populist attitude and Preventive Health Behaviors

34 **Populist Attitude and Conspiracist beliefs contribution to the overconfidence about the risk of**  
35 **Covid-19: implications for Preventive Health Behaviors**

36 Since the Covid-19 pandemic has begun, we witnessed a reiterated attempt by the main populist  
37 leaders all around the world to minimize the severity of the public health crisis. In Italy, the  
38 downplaying of the risk of Covid-19 epidemic, carried out by populist opposition parties, such as  
39 Lega of Matteo Salvini or Fratelli d'Italia of Giorgia Meloni, was appreciated by a large portion of  
40 the Italian population, that is that part of the electorate in search of simplistic solutions to the critical  
41 unprecedented situation we're facing. Furthermore, the search for alternative answers to the  
42 "official" ones has led to an increase in the circulation of fake news and conspiracy theories, very  
43 often reposted by populist leaders' official accounts. An emblematic example of this dynamic was  
44 the suggestion made by populist leaders, such as Bolsonaro (in Brazil), Trump (in U.S.A.), Salvini  
45 and Meloni (in Italy) to use hydroxychloroquine to treat Covid-19 disease, without any scientific  
46 evidence of the drug efficacy in this field.

47 In the present study we hypothesize that populist approach to COVID-19 pandemic along with  
48 belief in conspiracy theories may have contributed to undermine the risk of the deceased and may  
49 have ultimately interfered with the adoption of safety prescriptions by lay people. Consequently,  
50 people may decide to not comply with preventive behaviors, deeming them unnecessary, given their  
51 overconfidence about the risk of Covid-19.

52 **The relation between Populism and Conspiracy Beliefs**

53 Not rarely, the rising of populism rates among the population and the spread of conspiracy theories  
54 seem to go hand in hand. From previous definitions it emerges how populists see the élites as "one  
55 homogeneous corrupt group that works against the 'general will' of the people [...] some shadowy  
56 forces that continued to hold on to illegitimate powers to undermine the voice of the people" [1].  
57 Interestingly, this narrative is also typical of many conspiracy theories. As Sutton and Douglas [2]  
58 argued "[t]o believe in any conspiracy theory is to believe that authorities can be malevolent, that  
59 they can conceal their evildoing, and that official explanations for major events may be lies".

## RUNNING HEAD: Populist attitude and Preventive Health Behaviors

60 It should come as no surprise that authors who study populism pointed out that politicians of this  
61 mold define and portray their opponents as a conspiratorial elite [3, 4, 1] and in cases, openly resort  
62 to real conspiracy theories to describe certain events: Albertazzi [5] recalls how far-right parties in  
63 Italy often claim that immigrants and refugees are there with the only purpose of creating “unholy  
64 coalitions to ruin law-abiding citizens”. Another example is represented by former US President  
65 Donald Trump, who was one of the most illustrious exponents of the so-called "birther movement"  
66 and encouraging people to believe in the false statement that then candidate Obama to U.S.A.  
67 presidency was ineligible as he was not a natural-born citizen of the U.S., as required by Article  
68 Two of the American Constitution.

69 Over time, scholars have tried to identify possible reasons why certain people tend to believe more  
70 easily in conspiracy theories: among the personal traits which have been found to play a role in this  
71 process, there is also a Manichean vision of reality, which reduces events to a simplistic clash  
72 between good and evil [6]. This characteristic is common to both populism and conspiracist  
73 mentality [4, 7].

74 As pointed out by Mark Fenster [8], so-called conspiracy theories proliferate in an environment in  
75 which there is “the extreme – indeed, ultimate – skepticism of the political sphere by a sector of the  
76 population that feels excluded” [8]. Similarly, believing in conspiracy theories necessitates a belief  
77 by citizens that politicians are exclusively engaged in illicit activities aimed at deceiving the  
78 population and organizing plans to gain global control [8]. This cynical and disillusioned view of  
79 the political sphere and its institutions is also clearly associated with the construct of populism and  
80 with the strong preference for parties of this ideological and communicative orientation [9]. Finally,  
81 Castanho Silva et al. [10] found a significant and positive correlation between conspiracy beliefs  
82 and populism, corroborating the link between the two constructs.

83 **Conspiracy Beliefs, compliance with preventive behaviors and the overconfidence about the**  
84 **risk of Covid-19**

## RUNNING HEAD: Populist attitude and Preventive Health Behaviors

85 What happens when populist parties endorse conspiracy theories in affirming that preventive health  
86 behaviors, like those requested for reducing the risk of Covid-19, are just means to take people  
87 under control? Maftai and Holman [11] conducted a study in Romania aimed at exploring the  
88 relationship between the tendency to believe in conspiracy theories and three different variables,  
89 namely the perceived risk of Covid-19 disease, the perception of adequacy of anti-Covid-19 rules  
90 established by the government and the personal disposition to follow those rules. Based on previous  
91 studies [12, 13], the researchers expected to find a strong relationship between high levels of the  
92 variable called "conspiracist beliefs" and a general skepticism towards preventive norms, such as  
93 social distancing and the mandatory use of the mask. Results showed a strong positive correlation  
94 between the perceived risk and compliance with preventive behaviors. Furthermore, both perceived  
95 risk and the adherence to preventive norms were found to be negatively correlated with conspiracist  
96 mentality. These findings are in line with previous research, which had highlighted how the  
97 endorsement of conspiracy beliefs represent a concrete obstacle for the compliance with preventive  
98 treatments and behaviors, and how these beliefs often negatively affect health-related behaviors [14,  
99 15].

### 100 **How overconfidence about the risk of Covid-19 may affect compliance with preventive health** 101 **behaviors?**

102 As it will be more widely discussed in the next section of this paper, we also hypothesized a relation  
103 between the perceived severity of Covid-19 disease and people's willingness to respect preventive  
104 behaviors. This relation was also investigated by Plohl and Musil [16]. In particular, the authors'  
105 expectation was that people who were concerned the most about Covid-19 severity would also be  
106 more inclined to comply with preventive behaviors. Results confirmed this hypothesis by  
107 highlighting a significant positive relation between perceived severity of Covid-19 disease and  
108 citizens' compliance with preventive behaviors. These results are also in line with those obtained in  
109 past studies [17, 18, 19].

### 110 **Populism, Conspiracy Beliefs and Preventive Behaviors**

## RUNNING HEAD: Populist attitude and Preventive Health Behaviors

111 We have so far described studies in which the conspiracy mentality was taken into consideration as  
112 a possible obstacle to the implementation of preventive behaviors. However, despite the strong  
113 relation between populist attitude and the tendency to believe in conspiracy theories, also shown by  
114 Castanho Silva et al. [10], there are only few studies that have taken into consideration how  
115 populism may affect the perception that specific group of people (like conspiracist groups) might  
116 have developed about the Covid-19 pandemic. Moreover, the existence of this relation could have  
117 an impact on people's adherence to preventive behaviors by simply altering (i.e., reducing in this  
118 case) their confidence in perceived risk. In a study conducted by Stecula and Pickup [20], both  
119 populism and the spread of conspiracy theories was taken into consideration, with the aim of  
120 investigating their role in how Covid-19 pandemic was perceived by a specific group of citizens. In  
121 particular, the authors' goal was to describe how populism has been fueling the spread of conspiracy  
122 theories during the current pandemic crisis, and the impact that this mechanism seems to be having  
123 on individuals' decision to comply with preventive norms against the spread of SARS-CoV-2.  
124 Scholars have hypothesized that populist people are more likely to believe in conspiracy theories  
125 and are therefore less motivated to respect preventive rules and experts' recommendations. The  
126 study revealed a significant and positive correlation between populism and conspiracy beliefs,  
127 which in turn was negatively correlated with individuals' adherence to preventive behaviors.  
128 Although the authors seem to suggest the existence of a mediation effect of populism on preventive  
129 behaviors through the effect of conspiracy beliefs, they did not test a mediation model to investigate  
130 this hypothesis. Moreover, as far as we know, there does not seem to be any previous study which  
131 has explored a possible direct relation between populism and compliance with preventive rules, just  
132 as there do not appear to be studies that have hypothesized a positive effect of populism on the  
133 increase of overconfidence about the risk of Covid-19 disease. For these reasons, these two possible  
134 relations are advanced and tested in a mediation model in the current study.

## 135 **Main Hypotheses**

## RUNNING HEAD: Populist attitude and Preventive Health Behaviors

136 Based on literature previously discussed and on the specific context of Covid-19 epidemic, we  
137 hypothesize that Populism may affect Conspiracy Beliefs. We believe that the direction of this  
138 relationship better describes what has been vehiculated by national and international media, where  
139 populist leaders endorsed conspiracist themes to undermine scientific experts who were trying to  
140 stress the real risk about Covid-19. This endorsement may have reinforced populist people's  
141 conspiracy beliefs regarding an unspecified ordeal arranged by elites in the attempt to control  
142 people. Furthermore, given that both populism and conspiracy beliefs point to undermine the  
143 opinion of scientific experts about the risk of Covid-19, both may significantly increase the  
144 overconfidence about the risk of the disease by substantially undermining it. Moreover, the increase  
145 in the overconfidence about the risk of Covid-19 may be reflected in a lowered tendency to adopt  
146 preventive health behaviors, like those prescribed during the Covid-19 emergency (i.e., the  
147 quarantine, distancing from others and mask prescriptions).

### 148 **Method**

#### 149 **Participants**

150 Given that the hypothesized relationships basically represent a serial mediation with two mediators  
151 (beliefs in conspiracy theories and overconfidence about the risk of Covid-19), we estimated the  
152 optimal sample size following the procedure described in Schoemann, Boulton and Short [21]. By  
153 setting an expected power of .90, a type 1 error rate of .05, and a conservative standardized  
154 regression coefficient of .20 for the three hypothesized relationships we obtained an ideal sample  
155 size of about 400 units (power 95% Monte Carlo C.I. with 20000 draws and 5000  
156 replications: .93; .95).

157 A sample of 477 participants (Females  $n = 313$ ) with an average age of about 38 ( $SD = 14$ ) took part  
158 in the online study (after giving a written informed consent) that run from December 2020 to March  
159 2021 (i.e., during the quarantine and at the beginning of the availability of the Covid-19 vaccine in  
160 Italy). About 86.8% ( $n = 386$ ) of the sample reported to have not been infected by Covid-19 virus  
161 and just 10% ( $n = 47$ ) declared to be already vaccinated against Covid-19, while about 32.5% ( $n =$

## RUNNING HEAD: Populist attitude and Preventive Health Behaviors

162 155) declared to have the intention to take the vaccine and about 60% ( $n = 286$ ) of the sample  
163 preferred to do not respond. Finally, about 51.8% ( $n = 247$ ) of participants declared to be politically  
164 left-center oriented, while about 34.2% ( $n = 163$ ) declared to be politically center oriented and the  
165 remaining 14.1% ( $n = 67$ ) was politically right-oriented.

### 166 **Data availability statement**

167 All data and scripts for replicating all results discussed in the manuscript are available at the  
168 following address: [https://osf.io/q8fwt/?view\\_only=59ae52b6c7b540848c13d25ad8201ee3](https://osf.io/q8fwt/?view_only=59ae52b6c7b540848c13d25ad8201ee3).

### 169 **Analysis Strategy**

170 In order to investigate main hypotheses, we run Confirmatory factor Analysis (CFA) for testing  
171 factor structures still to be adapted in Italy measures and Structural Equation Model (SEM) for  
172 testing the structural paths among latent factors. We run a preliminary check of multivariate  
173 normality of items of each factor structures considered in the SEM (populism, conspiracy believes,  
174 perceived risk, prevention health behaviors), and we found that in all cases the assumption was  
175 violated to some extent (respectively: Anti-Establishment Attitudes *Henze-Zirkler test* = 4.99,  $p$   
176 < .001; Demand for Sovereign of the People *Henze-Zirkler test* = 7.78,  $p$  < .001; Belief in  
177 Homogeneity of People *Henze-Zirkler test* = 6.53,  $p$  < .001; Generic Conspiracist Beliefs *Henze-*  
178 *Zirkler test* = 4.60,  $p$  < .001; Perceived risk *Henze-Zirkler test* = 14.11,  $p$  < .001; Preventive Health  
179 Behaviors *Henze-Zirkler test* = 104.21,  $p$  < .001). Given these results, we opted for the Diagonally  
180 Weighted Least Square (DWLS, [22]) as method of estimation of SEM parameters as these methods  
181 have been shown to give consistent parameter estimates when multivariate normality is violated  
182 [23]. In order to assess the goodness of model fit, we used other than the normal theory Chi-squared  
183 statistics, also absolute fit indices like Root Mean Squared Error of Approximation (RMSEA) and  
184 Standardized Root Mean Squared Residual (SRMR), with relative fit indices like Comparative Fit  
185 index (CFI) and Non-Normed Fit Index (NNFI or Tucker-Lewis Index). Values of RMSEA and of  
186 SRMR below .08, and values of CFI and NFI above .90 are indicative of model good fit [24].



## RUNNING HEAD: Populist attitude and Preventive Health Behaviors

187 For those measures for which we cannot retrieve a published validation study from literature (in  
188 general or adaptation study in our country), we run a Confirmatory factor analysis in order to  
189 inspect psychometric properties of the hypothesized factor structure. In these cases, we also  
190 estimated reliability indices: Cronbach alpha) [25], and McDonald's omega [26] for first and the  
191 omega L2 for second order factors [26].

192 All analyses were run with R software [27] and psych package [28]. For multivariate normality  
193 check we used the mvn package [29]. For SEM we used the lavaan package [30]. For reliability of  
194 second order factors, we used the semTools package [31]. Indirect effects were estimated with  
195 *bootstrap* procedure (with 1000 bootstrap samples) as indicated in McKinnon, Lockwood, and  
196 Williams [32].

### 197 **Procedure and Measures**

198 All participants completed the following list of questionnaires:

199 Populist Attitude Scale (PAS) developed by Schulz, Muller, Schemer, Wirz, Wettstein and Wirth  
200 [33]. The PAS measures three dimensions of Populism attitude on a 5-steps graded responses scale  
201 (1 = *strongly disagree*; 5 = *strongly agree*): the Anti-Elitism Attitude (AEA) with 4 items (e.g. “MPs  
202 in Parliament very quickly lose touch with ordinary people”, “People like me have no influence on  
203 what the government does”); the Demand for Sovereign of the People (DSP) with 4 items (e.g. “The  
204 people should be asked whenever important decisions are taken”, “The politicians in Parliament  
205 need to follow the will of the people”); and finally the Belief in Homogeneity of People (BHP) with  
206 4 items (e.g., “Ordinary people all pull together”, “Ordinary people are of good and honest  
207 character”). Even if the Italian version of PAS may be found in the literature, we did not find a  
208 validation study reporting the psychometric properties of PAS-ita, therefore we proceeded to item  
209 translation and back-translation by mother tongue experts. We tested the PAS-ita factor structure  
210 (three first order factors with one second-order factor) [33] in a Confirmatory Factor Analysis  
211 (CFA). Results showed that the model has good fit indices ( $\chi^2(51) = 73.41, p = .022; RMSEA = .030,$   
212  $RMSEA\ 90\% C.I.: .012; .045; SRMR = .047; CFI = .992; NNFI = .990$ ). Completely standardized

## RUNNING HEAD: Populist attitude and Preventive Health Behaviors

213 factor loadings for the three first order factors were all positive and statistically significant and  
214 ranging from .452 to .694 for AEA factor, from .638 to .877 for DSP factor and ranging from .573  
215 to .774 for BHP factor. Finally, all the three factors saturated positively and significantly (with  
216 estimates ranging from .619 to 7.58) on the second order factor (Populism Attitude). Regarding  
217 reliability, the AEA reported lowest values (*Cronbach alpha* = .63; *McDonald's omega* = .64), while  
218 DSP (*Cronbach alpha* = .87; *McDonald's omega* = .88) and BHP (*Cronbach alpha* = .81;  
219 *McDonald's omega* = .81) reported satisfactory values. Finally, the Populism Attitude second-order  
220 factor reported a discrete reliability (*McDonald's omega L2* = .72).

221 Generic Conspiracist Beliefs scale (GCB) is a 15 items scale developed by Brotherton, French and  
222 Pickering [34]. The GCB assesses 5 highly correlated dimensions (or facets as Authors call them) of  
223 conspiracist beliefs: Government Malfeasance (GM, 3 items, e.g. "The government uses people as  
224 patsies to hide its involvement in criminal activity"), Extraterrestrial Cover-up (ET, 3 items, e.g.  
225 "Evidence of alien contact is being concealed from the public"), Malevolent global conspiracies  
226 (MG, 3 items, e.g. "Certain significant events have been the result of the activity of a small group  
227 who secretly manipulate world events"), Personal Well Being (PW, 3 items, e.g. "Technology with  
228 mind-control capacities is used on people without their knowledge"), Control of Information (CI, 3  
229 items, e.g. "Groups of scientists manipulate, fabricate, or suppress evidence in order to deceive the  
230 public"). However, the use of these 5 dimensions is unclear as in Brotherton et al [34] authors  
231 develop and refine the 5 factors structure in the first 2 studies, but then in study 3 and 4 (concerning  
232 respectively criterion-related and discriminant validity aspects of GCB) the same authors use the  
233 GCB as uni-dimensional, leaving the reader a little disappointed on how to use the scale. In any  
234 case, we did not find a validation study providing psychometric properties of the GCB in Italy, so  
235 we preferred to investigate the factor structure of the GCB after translation and back-translation  
236 procedure. In CFA we compared fit indices of two competing factor structures: the uni-dimensional  
237 GCB and the five first-order correlated factors. Contrary to our expectation, the uni-dimensional  
238 factor structure performed better ( $\chi^2(90) = 108.43, p = .090$ ; *RMSEA* = .021, *RMSEA 90%*

RUNNING HEAD: Populist attitude and Preventive Health Behaviors

239 *C.I.*: .000; .034; *SRMR* = .065; *CFI* = .998; *NNFI* = .998) than the five factors structure ( $\chi^2(81) =$   
240 1059.35,  $p < .001$ ; *RMSEA* = .159, *RMSEA 90% C.I.*: .151; .168; *SRMR* = .163; *CFI* = .990; *NNFI*  
241 = .871; the five correlated factors model did not converge. In order to obtain it, we had to fix to zero  
242 the latent correlation between PW and CI). The reliability indices of GCB factor were excellent  
243 (*Cronbach alpha* = .94; *McDonald's omega* = .94). The Generic Conspiracist Beliefs score was  
244 computed as the sum of the 15 items. The higher the score the higher the tendency in believing in  
245 conspiracy.

246 The Overconfidence about the Risk of Covid-19 (ORC) was assessed with four items (rated on a 5-  
247 point rating scale ranging from 1 = *strongly disagree* to 5 = *strongly agree*) appropriately developed  
248 for this study. The four items (two positively and two negatively phrased) were as in the following:  
249 “Being infected by Covid-19 o some variants won’t have severe consequences for me”, “It can get  
250 hard to treat people positive for Covid-19 or its variants [reversed]”, “Being infected by Covid-19  
251 or by its variants can be really risky [reversed]”, “Covid-19 or its variants are not worse than a bad  
252 flu”. *Cronbach alpha* was slightly below the acceptability (*Chronbach alpha*= .65), while  
253 *McDonald's omega* was satisfactory (*McDonald's omega* =.74). So as an indicator of the  
254 Overconfidence about the Risk of Covid-19 we computed the average score of the four items.  
255 Higher scores indicate a higher overconfidence.

256 Preventive Health behaviors were assessed with the following four items (rated on a 5-point rating  
257 scale ranging from 1 = *strongly disagree* to 5 = *strongly agree*) appropriately developed for this  
258 study: “I always take the distance from other people in crowded spaces”, “I have reduced social  
259 interactions”, “I follow and I have followed all Government prescriptions, including those  
260 concerning movements across regions”, “I always wear adequately the mask”. The analysis of  
261 reliability resulted in adequate estimates (*Cronbach alpha* = .86; *McDonald's omega* = .88). As an  
262 indicator of the Preventive Health Behaviors, we computed the average score of the four items. So,  
263 the higher the score the higher the tendency to endorse preventive health behaviors.

RUNNING HEAD: Populist attitude and Preventive Health Behaviors

264 Finally, all participants completed a socio-demographic sheet where they were asked about: gender  
265 identification, age, occupation, level of education, political endorsed party (“If we went to elections  
266 tomorrow, which party would you vote for, most likely?”), if they had been infected by Covid-19  
267 (“to your knowledge, have you already contracted Covid-19?”), if they got vaccinated or intended  
268 to get the vaccine in future (“Have you already received the Covid-19 vaccine?”, “If not yet, will  
269 you get vaccinated against Covid-19 when it's going to be your turn?”) and if they considered  
270 themselves as at-risk subjects (“Do you think you have at least one of the diseases that constitute a  
271 risk factor for Covid-19? e.g. immunosuppression, ischemic heart disease, stroke, arterial  
272 hypertension, diabetes mellitus etc.”).

273 All procedures and measures included in the study were in accordance with the ethical standards  
274 approved by the Department of “Psychology of Development and Socialization Processes” Ethics  
275 Committee, which gave approval to our study, and with 1964 Helsinki declaration on ethical  
276 standards.

277 **Results**

278 Table 1 shows descriptive statistics for items and for latent factors considered in the present study.

279

280

|                                 | M    | SD   | Me   | Min | Max | Skew  | Kurtosis |
|---------------------------------|------|------|------|-----|-----|-------|----------|
| <i>Populist Attitude Items:</i> |      |      |      |     |     |       |          |
| ant1                            | 3.84 | 0.99 | 4.00 | 1.0 | 5   | -0.48 | -0.37    |
| ant2                            | 3.94 | 1.03 | 4.00 | 1.0 | 5   | -0.85 | 0.22     |
| ant3                            | 3.53 | 1.24 | 4.00 | 1.0 | 5   | -0.36 | -0.97    |
| ant4                            | 3.93 | 1.03 | 4.00 | 1.0 | 5   | -0.74 | -0.10    |
| sov1                            | 3.32 | 1.37 | 3.00 | 1.0 | 5   | -0.24 | -1.18    |
| sov2                            | 3.24 | 1.39 | 3.00 | 1.0 | 5   | -0.20 | -1.24    |
| sov3                            | 2.65 | 1.34 | 3.00 | 1.0 | 5   | 0.42  | -0.92    |

RUNNING HEAD: Populist attitude and Preventive Health Behaviors

|      |      |      |      |     |   |       |       |
|------|------|------|------|-----|---|-------|-------|
| sov4 | 3.83 | 1.13 | 4.00 | 1.0 | 5 | -0.70 | -0.39 |
| hom1 | 2.53 | 1.17 | 2.00 | 1.0 | 5 | 0.43  | -0.54 |
| hom2 | 2.21 | 1.16 | 2.00 | 1.0 | 5 | 0.72  | -0.31 |
| hom3 | 2.42 | 1.17 | 2.00 | 1.0 | 5 | 0.56  | -0.48 |
| hom4 | 2.12 | 1.19 | 2.00 | 1.0 | 5 | 0.90  | -0.07 |

*Populist Attitude Scores:*

|                                 |      |      |      |     |   |       |       |
|---------------------------------|------|------|------|-----|---|-------|-------|
| AEA Average score               | 3.81 | 0.74 | 3.75 | 1.0 | 5 | -0.44 | 0.23  |
| DSP Average score               | 3.26 | 1.11 | 3.25 | 1.0 | 5 | -0.11 | -0.92 |
| BHP Average score               | 2.32 | 0.93 | 2.25 | 1.0 | 5 | 0.69  | 0.10  |
| Populism Attitude Average score | 3.13 | .70  | 3.08 | 1.2 | 5 | 0.16  | -0.16 |

*Generic Conspiracist Beliefs items:*

|        |      |      |      |     |   |      |       |
|--------|------|------|------|-----|---|------|-------|
| gm2    | 2.11 | 1.24 | 2.00 | 1.0 | 5 | 0.92 | -0.20 |
| gm1    | 2.39 | 1.30 | 2.00 | 1.0 | 5 | 0.53 | -0.83 |
| gm3    | 2.06 | 1.21 | 2.00 | 1.0 | 5 | 0.91 | -0.22 |
| mglob3 | 2.22 | 1.34 | 2.00 | 1.0 | 5 | 0.76 | -0.70 |
| mglob2 | 2.53 | 1.38 | 2.00 | 1.0 | 5 | 0.40 | -1.13 |
| mglob1 | 2.74 | 1.34 | 3.00 | 1.0 | 5 | 0.19 | -1.15 |
| et2    | 1.57 | 1.07 | 1.00 | 1.0 | 5 | 1.94 | 2.88  |
| et1    | 1.33 | 0.86 | 1.00 | 1.0 | 5 | 2.82 | 7.42  |
| et3    | 1.56 | 1.05 | 1.00 | 1.0 | 5 | 1.97 | 3.08  |
| pw2    | 2.25 | 1.44 | 2.00 | 1.0 | 5 | 0.74 | -0.89 |
| pw1    | 1.86 | 1.21 | 1.00 | 1.0 | 5 | 1.28 | 0.57  |
| pw3    | 1.72 | 1.12 | 1.00 | 1.0 | 5 | 1.53 | 1.39  |
| ci1    | 1.93 | 1.25 | 1.00 | 1.0 | 5 | 1.18 | 0.24  |
| ci2    | 2.14 | 1.19 | 2.00 | 1.0 | 5 | 0.75 | -0.38 |
| ci3    | 2.88 | 1.37 | 3.00 | 1.0 | 5 | 0.11 | -1.17 |

RUNNING HEAD: Populist attitude and Preventive Health Behaviors

*Generic Conspiracist Beliefs scores:*

|                                            |      |      |      |     |   |      |       |
|--------------------------------------------|------|------|------|-----|---|------|-------|
| GM Average score                           | 2.19 | 1.11 | 2.00 | 1.0 | 5 | 0.85 | -0.20 |
| MG Average score                           | 2.50 | 1.20 | 2.33 | 1.0 | 5 | 0.50 | -0.85 |
| ET Average score                           | 1.49 | 0.85 | 1.00 | 1.0 | 5 | 2.08 | 4.04  |
| PW Average score                           | 1.94 | 1.08 | 1.67 | 1.0 | 5 | 1.03 | 0.03  |
| CI Average score                           | 2.32 | 1.04 | 2.00 | 1.0 | 5 | 0.62 | -0.44 |
| Generic Conspiracist Beliefs Average score | 2.09 | 0.91 | 1.80 | 1.0 | 5 | 0.96 | 0.27  |

*ORC items:*

|      |      |      |      |     |   |       |       |
|------|------|------|------|-----|---|-------|-------|
| orc1 | 2.35 | 1.17 | 2.00 | 1.0 | 5 | 0.54  | -0.55 |
| orc2 | 3.89 | 1.12 | 4.00 | 1.0 | 5 | -0.78 | -0.15 |
| orc3 | 4.21 | 1.00 | 5.00 | 1.0 | 5 | -1.14 | 0.63  |
| orc4 | 1.74 | 1.08 | 1.00 | 1.0 | 5 | 1.50  | 1.53  |

*ORC Score*

|                   |      |      |      |     |   |      |      |
|-------------------|------|------|------|-----|---|------|------|
| ORC Average score | 2.00 | 0.76 | 1.75 | 1.0 | 5 | 0.81 | 0.65 |
|-------------------|------|------|------|-----|---|------|------|

*Preventive Health Behavior items:*

|       |      |      |      |     |   |       |      |
|-------|------|------|------|-----|---|-------|------|
| comp1 | 4.60 | 0.76 | 5.00 | 1.0 | 5 | -2.17 | 4.91 |
| comp2 | 4.56 | 0.80 | 5.00 | 1.0 | 5 | -2.09 | 4.46 |
| comp3 | 4.42 | 1.00 | 5.00 | 1.0 | 5 | -1.85 | 2.80 |
| comp4 | 4.68 | 0.76 | 5.00 | 1.0 | 5 | -2.79 | 8.00 |

*Preventive Health Behavior Score*

|                                          |      |      |      |     |   |       |      |
|------------------------------------------|------|------|------|-----|---|-------|------|
| Preventive Health Behavior Average score | 4.56 | 0.70 | 5.00 | 1.0 | 5 | -2.42 | 7.05 |
|------------------------------------------|------|------|------|-----|---|-------|------|

score

281 *Note:* AEA = Anti-Elitism Attitude; DSP = Demand for Sovereign of the People; BHP = Belief in  
 282 Homogeneity of People; GM SCORE = Government Malfeasance; MG SCORE = Malevolent  
 283 global conspiracies; ET SCORE = Extraterrestrial Cover-up; PW SCORE = Personal Well Being;

## RUNNING HEAD: Populist attitude and Preventive Health Behaviors

284 CI SCORE = Control of Information; GCB = Generic Conspiracist Beliefs; ORC = Overconfidence  
285 about the Risk of Covid-19

286

### 287 **Table 1**

288 *Descriptive statistics (M, SD, Me, Min-Max, Skewness and Kurtosis) for observed and latent factors*  
289 *indicators*

290

### 291 **Structural Equation Model**

292 Results of the Structural Equation analysis showed the hypothesized model has really satisfactory  
293 fit indices ( $\chi^2(81) = 584.37, p = .118; RMSEA = .012, RMSEA\ 90\% C.I.: .000; .020; SRMR = .054;$   
294  $CFI = .998; NNFI = .998$ ). Considering the structural paths (table 2, figure 1) we can see that all the  
295 three populist attitudes (AEA, DSP and BHP) have significant and positive effects on GCB  
296 (respectively: AEA  $b = .246, se = .193, bootstrap\ 95\% C.I.: .274; 1.039$ ; DSP  $b = .237, se = .059,$   
297  $bootstrap\ 95\% C.I.: .094; 0.463$ ; BHP  $b = .256, se = .078, bootstrap\ 95\% C.I.: .156; 0.463$ ). Turning  
298 to the prediction of the ORC, we see that none of the populist attitudes have a significant impact  
299 (respectively: AEA  $b = -.114, se = .099, bootstrap\ 95\% C.I.: -.329; .067$ ; DSP  $b = .127, se = .029,$   
300  $bootstrap\ 95\% C.I.: -.003; 0.112$ ; BHP  $b = .096, se = .044, bootstrap\ 95\% C.I.: -.033; 0.148$ ), while  
301 GCB has a positive and significant effect on Perceived Risk ( $b = .321, se = .047, bootstrap\ 95\%$   
302  $C.I.: .061; .242$ ). Finally, the three populist attitudes were not significant also when considering the  
303 prediction of Preventive Health Behaviors (respectively: AEA  $b = .015, se = .106, bootstrap\ 95\%$   
304  $C.I.: -.211; .216$ ; DSP  $b = -.013, se = .029, bootstrap\ 95\% C.I.: -.064; .055$ ; BHP  $b = .091, se = .047,$   
305  $bootstrap\ 95\% C.I.: -.032; .164$ ). However, both GCB ( $b = -.169, se = .039, bootstrap\ 95\% C.I.: -$   
306  $.167; -.012$ ) and ORC ( $b = .537, se = .230, bootstrap\ 95\% C.I.: -1.057; -.414$ ) reported a significant  
307 and negative effect. So, to sum up, we found that three populist attitudes are positively associated  
308 with GCB, that the GCB is positively associated with the Overconfidence about the Risk of Covid-

RUNNING HEAD: Populist attitude and Preventive Health Behaviors

309 19 (ORC), and that both GCB and the Overconfidence about the Risk of Covid-19 are negatively  
 310 associated with Preventive Health Behaviors.

311

312 Figure 1 about here

313 **Figure 1**

314 *Structural Relationships among Populist attitude, Generic Conspiracist Beliefs, Overconfidence*

315 *about the Risk of Covid-19 and Preventive Health Behaviors*

316

317

| Criteria                          | b      | s.e.  | Bootstrap 95% C.I. |        |
|-----------------------------------|--------|-------|--------------------|--------|
|                                   |        |       | Lower              | Upper  |
| <b>GCB</b>                        |        |       |                    |        |
| AEA                               | 0.246  | 0.193 | 0.274              | 1.039  |
| DSP                               | 0.237  | 0.059 | 0.094              | 0.317  |
| BHP                               | 0.256  | 0.078 | 0.156              | 0.463  |
| <b>ORC</b>                        |        |       |                    |        |
| GCB                               | 0.321  | 0.047 | 0.061              | 0.242  |
| AEA                               | -0.114 | 0.099 | -0.329             | 0.067  |
| DSP                               | 0.127  | 0.029 | -0.003             | 0.112  |
| BHP                               | 0.096  | 0.044 | -0.033             | 0.148  |
| <b>Preventive Health Behavior</b> |        |       |                    |        |
| AEA                               | 0.015  | 0.106 | -0.211             | 0.216  |
| DSP                               | -0.013 | 0.029 | -0.064             | 0.055  |
| BHP                               | 0.091  | 0.047 | -0.032             | 0.164  |
| GCB                               | -0.169 | 0.039 | -0.167             | -0.012 |
| ORC                               | -0.537 | 0.230 | -1.057             | -0.414 |



## RUNNING HEAD: Populist attitude and Preventive Health Behaviors

318 *Note:* AEA = Anti-Elitism Attitude; DSP = Demand for Sovereign of the People; BHP = Belief in  
319 Homogeneity of People; GCB = Generic Conspiracist Beliefs; ORC = Overconfidence about the  
320 Risk of Covid-19 (ORC)

### 321 **Table 2**

322 *Completely standardized structural coefficients, s.e., and bootstrap 95% C.I. (for non-standardized*  
323 *coefficients)*

324

### 325 **Indirect Effects**

326 As can be seen in Table 3, the three populist attitude does not have a significant indirect effect on  
327 Preventive Health behaviors through the ORC (respectively: AEA→ORC→Preventive Health  
328 Behavior  $b = .061$ ,  $se = .062$ , bootstrap 95% C.I.  $-.045; .202$ ; DSP→ORC→Preventive Health  
329 Behavior  $b = -.068$ ,  $se = .020$ , bootstrap 95% C.I.  $-.075; .002$ ; BHP→ORC→Preventive Health  
330 Behavior  $b = -.052$ ,  $se = .028$ , bootstrap 95% C.I.  $-.092; .020$ ). However we found a significant and  
331 negative indirect effect of populist attitudes on Preventive Health Behaviors through GCB and  
332 through ORC (respectively: AEA→GCB→ORC→Preventive Health Behavior  $b = -.042$ ,  $se = .024$ ,  
333 *bootstrap 95% C.I.  $-.114; -.019$* ; DSP→GCB→ORC→Preventive Health Behavior  $b = -.041$ ,  $se = .008$ ,  
334 *bootstrap 95% C.I.  $-.038; -.006$* ; BHP→GCB→ORC→Preventive Health Behavior  $b = -.044$ ,  $se = .012$ ,  
335 *bootstrap 95% C.I.  $-.054; -.010$* ). Therefore, an increase in populist attitude may determine a  
336 lowered tendency in adopting Preventive health related behaviors through the increase in  
337 conspiracist beliefs, which in turn increase the overconfidence about health-Covid-19 related risk.  
338 Pairwise comparisons were considered for contrasting the longest indirect effects. Results (table 3)  
339 showed that no significant differences emerged between any couple of indirect effects. Hence all the  
340 three longest indirect effects have equal impact on Preventive Health Behaviors.  
341 Worth to note, the total effects of the three populist attitudes (table 3), i.e., the algebraic sum of  
342 direct and indirect effects (or the effect of populist attitudes on preventive health behaviors when

RUNNING HEAD: Populist attitude and Preventive Health Behaviors

343 mediators are omitted), give some valuable insights. Indeed, the total effect of AEA on preventive  
 344 health related behaviors is not significant ( $b = -.008, se = .117, bootstrap\ 95\% C.I. -.266; .184$ ) as  
 345 well as the total effect of BHP on preventive health behaviors ( $b = -.046, se = .054, bootstrap\ 95\%$   
 346  $C.I. -.166; .054$ ). However, the total effect of DSP on preventive health behaviors is still negative  
 347 and significant ( $b = -.164, se = .037, bootstrap\ 95\% C.I. -.188; -.042$ ). In conclusion, while the total  
 348 effects of AEA and BHP are suppressed, that of DSP is not.

349

350

|                                            | b      | s.e.  | Bootstrap 95% C.I. |        |
|--------------------------------------------|--------|-------|--------------------|--------|
|                                            |        |       | Lower              | Upper  |
| <i>Indirect effects AEA:</i>               |        |       |                    |        |
| AEA→ORC→Preventive Health Behavior         | 0.061  | 0.062 | -0.045             | 0.202  |
| AEA→GCB→Preventive Health Behavior         | -0.042 | 0.031 | -0.128             | -0.006 |
| AEA→GCB→ORC→Preventive Health Behavior (a) | -0.042 | 0.024 | -0.114             | -0.019 |
| <i>Indirect effects DSP:</i>               |        |       |                    |        |
| DSP→ORC→Preventive Health Behavior         | -0.068 | 0.020 | -0.075             | 0.002  |
| DSP→GCB→Preventive Health Behavior         | -0.040 | 0.009 | -0.038             | -0.002 |
| DSP→GCB→ORC→Preventive Health Behavior (b) | -0.041 | 0.008 | -0.038             | -0.006 |
| <i>Indirect effects BHP:</i>               |        |       |                    |        |
| BHP→ORC→Preventive Health Behavior         | -0.052 | 0.028 | -0.092             | 0.020  |
| BHP→GCB→Preventive Health Behavior         | -0.043 | 0.015 | -0.060             | -0.003 |
| BHP→GCB→ORC→Preventive Health Behavior (c) | -0.044 | 0.012 | -0.054             | -0.010 |

RUNNING HEAD: Populist attitude and Preventive Health Behaviors

*Total Effects:*

|                                                   |        |       |        |        |
|---------------------------------------------------|--------|-------|--------|--------|
| Total effect of AEA on Preventive Health Behavior | -0.008 | 0.117 | -0.266 | 0.184  |
| Total effect of DSP on Preventive Health Behavior | -0.164 | 0.037 | -0.188 | -0.042 |
| Total effect of BHP on Preventive Health Behavior | -0.046 | 0.054 | -0.166 | 0.054  |

351 *Note:* AEA = Anti-Elitism Attitude; DSP = Demand for Sovereign of the People; BHP = Belief in  
 352 Homogeneity of People; GCB = Generic Conspiracist Beliefs; ORC = Overconfidence about the  
 353 Risk of Covid-19

354 **Table 3**

355 *Indirect and Total effects: completely standardized structural coefficients, s.e., and bootstrap 95%*  
 356 *C.I.*

357

358 **Discussion**

359 The goal of our study was to investigate whether populism and beliefs in conspiracy theories, two  
 360 attitudes sharing a deep distrust toward political and economic elite and experts, may affect the  
 361 adoption of preventive health behaviors. In particular, in the present study we hypothesized that  
 362 both populism and conspiracy beliefs may inflate overconfidence about perceived health risk and  
 363 that this overconfidence may be responsible for the undermining of preventive health behaviors. To  
 364 verify our hypotheses, we ran an online survey during quarantine and at the beginning of the  
 365 vaccine release on a national basis and asked participants about their willingness to comply with  
 366 preventive behaviors against the spread of SARS-CoV-2. Results showed that a populist attitude is  
 367 associated with a lower compliance with preventive rules. This finding is coherent with previous  
 368 studies: it has been seen, for example, how the rise of populism was associated with specific  
 369 attitudes regarding certain preventive behaviors, such as an increase in hesitation to get vaccinated

## RUNNING HEAD: Populist attitude and Preventive Health Behaviors

370 [35]. Moreover, in previous studies, anti-intellectualism (one of the founding elements of the  
371 populist attitude) has been associated with the rejection of information provided by experts and  
372 scientists [36]. Since preventive behaviors are based precisely on this information (in Italy the  
373 Technical-Scientific Committee [CTS] has provided the Government with the necessary  
374 information to develop a plan of stringent regulations against the spread of the virus), this could  
375 explain why, in our study, populism emerged to be associated with poor compliance with these  
376 behaviors. Populist people, in fact, could reject such recommendations due to the lack of trust  
377 placed in scientists' voices.

378 Likewise, in our study, we found that the tendency to believe in conspiracy theories was also  
379 associated with poor adherence to preventive behaviors against Covid-19, a result consistent with  
380 what has previously come up in the literature [11, 20, 16]. In fact, the spread of conspiracy theories  
381 about viruses such as HIV or about vaccines has already been found to be associated with a lower  
382 adherence to preventive behaviors and an increase in hesitation to get vaccinated [37, 15, 38, 39,  
383 14]. The fact that the spread of conspiracy theories represents an obstacle to the adoption of healthy  
384 behaviors comes therefore as no surprise if we take into consideration the previous literature [14,  
385 15]. One of the reasons why this happens could be due to a decrease in the perceived severity of the  
386 disease, which would lead people to underestimate the risk it can represent for themselves and for  
387 others. Indeed, confirming what has been argued so far, our study has shown that the tendency to  
388 believe in conspiracy theories is negatively associated with perceived severity, i.e. the belief in  
389 conspiracy theories induces an overconfidence about perceived severity of the disease, and this is  
390 also coherent with previous works [11, 16].

391 Overall, therefore, a populist attitude seems to lead to a lower compliance with preventive behaviors  
392 (and sometimes to an active and hostile rejection of them) by inflating conspiracy beliefs and the  
393 overconfidence about the risk of Covid-19.

## 394 **Limitations**

## RUNNING HEAD: Populist attitude and Preventive Health Behaviors

395 Even though the results discussed in our study support our hypotheses and show how political  
396 leaders embracing populist themes may affect people overconfidence in the perceived risk for their  
397 own health, we would stress the fact that our results are correlational in nature and lack the basis for  
398 a causal interpretation of the relationships considered. For this reason, it would be interesting to  
399 further explore the results we obtained in a future follow-up and find out whether they can be  
400 generalized to other contexts where both populism and conspiracy beliefs may exert their grip.  
401 A further theme that needs to be deepened in future studies is related to the relationship between  
402 populism and conspiracy beliefs. Literature and results of our study have shown that undoubtedly  
403 the two constructs are empirically associated. In our study we placed populism as an antecedent of  
404 beliefs in conspiracy beliefs, as we believe that in the Covid-19 epidemic populist leaders have  
405 played a crucial role in boosting conspiracist themes to undermine scientific experts. The  
406 endorsement of conspiracist themes by populist leaders has inevitably reinforced conspiracy beliefs  
407 in populist people. However, the two constructs, populism and conspiracy beliefs, are clearly  
408 distinct and it is not excluded that in other contexts the direction of the relationship may be different.  
409 Given that in Covid-19 pandemic political leaders have played a pivotal role, future studies should  
410 also consider the possible role of partisanship, that is the psychological attachment of an individual  
411 towards a specific political party [40]. One of the aspects of partisanship is indeed the tendency to  
412 take positions according to what is claimed by the political party with which one identifies the most,  
413 without a fair consideration of facts and circumstances. Although Stecula & Pickup's [20] study has  
414 shown that citizens' positions towards science were not dependent on the construct of partisanship,  
415 further investigations on the subject are crucial to extend the results of the aforementioned study  
416 (carried out in the American context) also to the Italian setting, in which, without neglecting the  
417 Movimento 5 Stelle variable, there would seem to be a clearer correspondence between populist  
418 attitudes and the expression of a Right-wing political orientation.

419

420

RUNNING HEAD: Populist attitude and Preventive Health Behaviors

421 **References**

- 422 1. Mudde, C., & Kaltwasser, C. R. Exclusionary vs. inclusionary populism: Comparing  
423 contemporary Europe and Latin America. *Government and opposition*, 2013; 48(2): 147-174.  
424 <https://doi.org/10.1017/gov.2012.11>
- 425 2. Sutton RM, Douglas KM. 14 Examining the monological nature of conspiracy theories.  
426 *Power, Politics, and Paranoia: Why People Are Suspicious of Their Leaders*. 2014; 29;29: 254-72.  
427 <https://doi.org/10.1017/CBO9781139565417.018>
- 428 3. Albertazzi, D., McDonnell, D. *Twenty-first century populism*, Springer. 2008.  
429 <http://dx.doi.org/10.1057/9780230592100>
- 430 4. Hawkins, K. A. Is Chávez populist? Measuring populist discourse in comparative  
431 perspective. *Comparative Political Studies*, 2009; 42(8): 1040-1067.  
432 <https://doi.org/10.1177%2F0010414009331721>
- 433 5. Albertazzi, D. Addressing ‘the People’: A Comparative Study of the Lega Nord’s and Lega  
434 dei Ticinesi’s Political Rhetoric and Styles of Propaganda. *Modern Italy*, 2007; 12(3): 327-347.  
435 <https://doi.org/10.1080/13532940701633791>
- 436 6. Oliver, J. E., & Wood, T. J. Conspiracy theories and the paranoid style (s) of mass opinion.  
437 *American Journal of Political Science*, 2014; 58(4): 952-966. <https://www.jstor.org/stable/24363536>
- 438 7. Hawkins, K. A. *Venezuela’s chavismo and populism in comparative perspectives*. 2010.  
439 Cambridge University Press.
- 440 8. Fenster, M. *Conspiracy theories: Secrecy and power in American culture*. 1999. University  
441 of Minnesota Press.
- 442 9. Doyle, D. The legitimacy of political institutions: Explaining contemporary populism in  
443 Latin America. *Comparative Political Studies*, 2011; 44(11): 1447-1473.  
444 <https://doi.org/10.1177%2F0010414011407469>

RUNNING HEAD: Populist attitude and Preventive Health Behaviors

- 445 10. Castanho Silva, B., Vegetti, F., & Littvay, L. The elite is up to something: Exploring the  
446 relation between populism and belief in conspiracy theories. *Swiss political science review*, 2017;  
447 23(4): 423-443. <https://doi.org/10.1111/spsr.12270>
- 448 11. Maftai, A., & Holman, A. C. Beliefs in conspiracy theories, intolerance of uncertainty, and  
449 moral disengagement during the coronavirus crisis. *Ethics & Behavior*, 2020; 1-11.  
450 <https://doi.org/10.1080/10508422.2020.1843171>
- 451 12. Erceg, N., Ružojčić, M., & Galić, Z. Misbehaving in the corona crisis: The role of anxiety  
452 and unfounded beliefs. *Current Psychology*, 2020; 1-10. [https://doi.org/10.1007/s12144-020-01040-](https://doi.org/10.1007/s12144-020-01040-4)  
453 [4](https://doi.org/10.1007/s12144-020-01040-4)
- 454 13. Fontaine, R. G., Fida, R., Paciello, M., Tisak, M. S., & Caprara, G. V. The mediating role of  
455 moral disengagement in the developmental course from peer rejection in adolescence to crime in  
456 early adulthood. *Psychology, Crime & Law*, 2014; 20(1): 1-19.  
457 <https://psycnet.apa.org/doi/10.1080/1068316X.2012.719622>
- 458 14. Offit, P. A. *Deadly Choices: How the Anti-Vaccine Movement Threatens Us All*. 2010. New  
459 York: Basic Books.
- 460 15. Westergaard, R. P., Beach, M. C., Saha, S., & Jacobs, E. A. Racial/ethnic differences in trust  
461 in health care: HIV conspiracy beliefs and vaccine research participation. *Journal of general internal*  
462 *medicine*, 2014; 29(1): 140-146. <https://doi.org/10.1007/s11606-013-2554-6>
- 463 16. Plohl, N., & Musil, B. Modeling compliance with COVID-19 prevention guidelines: The  
464 critical role of trust in science. *Psychology, Health & Medicine*, 2021; 26(1): 1-12.  
465 <https://doi.org/10.1080/13548506.2020.1772988>
- 466 17. Chen, J. Y., Fox, S. A., Cantrell, C. H., Stockdale, S. E., & Kagawa-Singer, M. Health  
467 disparities and prevention: racial/ethnic barriers to flu vaccinations. *Journal of community health*,  
468 2007; 32(1): 5-20. <https://doi.org/10.1007/s10900-006-9031-7>
- 469 18. Lau, J. T., Kim, J. H., Tsui, H. Y., & Griffiths, S. Anticipated and current preventive  
470 behaviors in response to an anticipated human-to-human H5N1 epidemic in the Hong Kong

RUNNING HEAD: Populist attitude and Preventive Health Behaviors

- 471 Chinese general population. *BMC Infectious Diseases*, 2007; 7(1): 1-12.
- 472 <https://doi.org/10.1186/1471-2334-7-18>
- 473 19. Maughan-Brown, B., & Venkataramani, A. S. Accuracy and determinants of perceived HIV  
474 risk among young women in South Africa. *BMC public health*, 2018; 18(1): 1-9.
- 475 <https://doi.org/10.1186/s12889-017-4593-0>
- 476 20. Stecula, D. A., & Pickup, M. How populism and conservative media fuel conspiracy beliefs  
477 about COVID-19 and what it means for COVID-19 behaviors. *Research & Politics*, 2021; 8(1).
- 478 <https://doi.org/10.1177%2F2053168021993979>
- 479 21. Schoemann, A. M., Boulton, A. J., & Short, S. D. Determining power and sample size for  
480 simple and complex mediation models. *Social Psychological and Personality Science*, 2017; 8(4):  
481 379-386. <https://doi.org/10.1177%2F1948550617715068>
- 482 22. Jöreskog, K. G., & Sörbom, D. LISREL 8: User's reference guide. 1996. Chicago, IL:  
483 Scientific Software International
- 484 23. Yang-Wallentin, F., Jöreskog, K. G., & Luo, H. Confirmatory factor analysis of ordinal  
485 variables with misspecified models. *Structural Equation Modeling*, 2010; 17(3): 392-423.
- 486 <http://dx.doi.org/10.1080/10705511.2010.489003>
- 487 24. Hu, L., & Bentler, P. M. Cutoff criteria for fit indexes in covariance structure analysis:  
488 Conventional criteria versus new alternatives. *Structural Equation Modeling*, 1999; 6: 1–55.
- 489 <https://doi.org/10.1080/10705519909540118>
- 490 25. Cronbach, L. J. Coefficient alpha and the internal structure of tests. *Psychometrika*, 1951;  
491 16(3): 297–334. <https://doi.org/10.1007/BF02310555>
- 492 26. McDonald, R. P. Test theory: A unified treatment. 1999. Mahwah, NJ: Erlbaum.
- 493 27. R Core Team R: A language and environment for statistical computing. 2021. R Foundation  
494 for Statistical Computing, Vienna, Austria. URL <https://www.R-project.org/>



RUNNING HEAD: Populist attitude and Preventive Health Behaviors

- 495 28. Revelle, W. psych: Procedures for Personality and Psychological Research, 2021,  
496 Northwestern University, Evanston, Illinois, USA, <https://CRAN.R-project.org/package=psych>  
497 Version = 2.1.6
- 498 29. Korkmaz S, Goksuluk D, Zararsiz G. MVN: An R Package for Assessing Multivariate  
499 Normality. The R Journal. 2014; 6(2): 151-162. <http://dx.doi.org/10.32614/RJ-2014-031>
- 500 30. Rosseel, Y. lavaan: An R Package for Structural Equation Modeling. Journal of Statistical  
501 Software, 2012; 48(2): 1-36. URL <http://www.jstatsoft.org/v48/i02/>
- 502 31. Jorgensen, T. D., Pornprasertmanit, S., Schoemann, A. M., & Rosseel, Y. semTools: Useful  
503 tools for structural equation modeling. R package version 0.5-5. 2021. Retrieved from  
504 <https://CRAN.R-project.org/package=semTools>
- 505 32. MacKinnon, D. P., Lockwood, C. M., & Williams, J. Confidence limits for the indirect effect:  
506 Distribution of the product and resampling methods. Multivariate Behavioral Research, 2004; 39:  
507 99-128. [https://dx.doi.org/10.1207/s15327906mbr3901\\_4](https://dx.doi.org/10.1207/s15327906mbr3901_4)
- 508 33. Schulz, A., Müller, P., Schemer, C., Wirz, D. S., Wettstein, M., & Wirth, W. Measuring  
509 populist attitudes on three dimensions. International Journal of Public Opinion Research, 2018;  
510 30(2): 316-326. <https://doi.org/10.1093/ijpor/edw037>
- 511 34. Brotherton, R., French, C. C., and Pickering, A. D. Measuring belief in conspiracy theories:  
512 the generic conspiracist beliefs scale. Frontiers in Psychology, 2013; 4: 1-15.  
513 <http://dx.doi.org/10.3389/fpsyg.2013.00279>
- 514 35. Kennedy, J. Populist politics and vaccine hesitancy in Western Europe: an analysis of  
515 national-level data. European journal of public health, 2019; 29(3): 512-516.  
516 <https://doi.org/10.1093/eurpub/ckz004>
- 517 36. Merkle, E. Anti-intellectualism, populism, and motivated resistance to expert consensus.  
518 Public Opinion Quarterly, 2020; 84(1): 24-48. <https://doi.org/10.1093/poq/nfz053>

RUNNING HEAD: Populist attitude and Preventive Health Behaviors

- 519 37. Gaston, G. B., & Alleyne-Green, B. The impact of African Americans' beliefs about HIV  
520 medical care on treatment adherence: a systematic review and recommendations for interventions.  
521 AIDS and Behavior, 2013; 17(1): 31-40. <https://doi.org/10.1007/s10461-012-0323-x>
- 522 38. Kata, A. Anti-vaccine activists, Web 2.0, and the postmodern paradigm—An overview of  
523 tactics and tropes used online by the anti-vaccination movement. Vaccine, 2012; 30(25): 3778-3789.  
524 <https://doi.org/10.1016/j.vaccine.2011.11.112>
- 525 39. Mills, E., Jadad, A. R., Ross, C., & Wilson, K. Systematic review of qualitative studies  
526 exploring parental beliefs and attitudes toward childhood vaccination identifies common barriers to  
527 vaccination. Journal of clinical epidemiology, 2005; 58(11): 1081-1088.  
528 <https://doi.org/10.1016/j.jclinepi.2005.09.002>
- 529 40. Campbell, A., Converse, P. E., Miller, W. E., & Stokes, D. E. The American voter. 1980.  
530 University of Chicago Press.

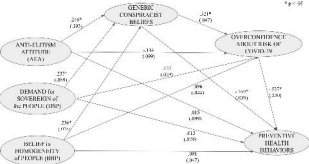

Source: https://medrxiv.org/content/10.1101/2022.01.30.22269992v1.full.pdf
